# Supplementary material
Source: PubMed Central journal article supplement (PMC4042393)
Supplement: NIHMS563197-supplement-Suppl_1.pdf [file NIHMS563197-supplement-Suppl_1.pdf]

Supplementary Table 1. Baseline clinical characteristics and pathologic outcomes. All men were NCCN very low risk, had extended biopsy sampling ( $\geq 10$  cores), and were treated in the modern Gleason grading era ( $\geq 2004$ )

|                                          | Caucasian, n=89   | African American, n=87 | <i>p</i>                 |
|------------------------------------------|-------------------|------------------------|--------------------------|
| <b>(a) PRE-OPERATIVE CHARACTERISTICS</b> |                   |                        |                          |
| Mean Age (Years)                         | 57.3              | 58.2                   | 0.240                    |
| Median PSA (ng/ml) (IQR)                 | 4.4 (3.3, 5.3)    | 4.5 (3.5, 5.7)         | 0.371*                   |
| Median Prostate size (g) (IQR)           | 48.5 (41.0, 55.9) | 49.7 (40.0, 65.4)      | 0.331*                   |
| Median PSA density (ng/ml/g) (IQR)       | 0.09 (0.07, 0.12) | 0.09 (0.06, 0.11)      | 0.746*                   |
| Number of positive cores                 |                   |                        | 0.557                    |
| 1                                        | 53 (59.6%)        | 48 (55.2%)             |                          |
| 2                                        | 36 (40.5%)        | 39 (44.8%)             |                          |
| Median % ca. per core (IQR)              | 10.0 (5.0, 30.0)  | 10.0 (5.0, 30.0)       | 0.450*                   |
| CAPRA                                    |                   |                        | 0.214                    |
| 0-1                                      | 76 (85.4%)        | 68 (78.2%)             |                          |
| 2-3                                      | 13 (14.6%)        | 19 (21.8%)             |                          |
| Family history                           | 41 (46.1%)        | 36 (41.4%)             | 0.487                    |
| Median BMI kg/m <sup>2</sup> (IQR)       | 27.2 (25.1, 29.7) | 27.5 (25.8, 30.1)      | 0.399*                   |
| Charlson index                           |                   |                        | <b>0.041<sup>†</sup></b> |
| 0                                        | 25/28 (89.3%)     | 18/29 (62.1%)          |                          |
| 1                                        | 3/28 (10.7%)      | 10/29 (34.5%)          |                          |
| 2 or 3                                   | 0/28 (0.0%)       | 1/29 (3.5%)            |                          |
| <b>(b) PATHOLOGIC CHARACTERISTICS</b>    |                   |                        |                          |
| Pathologic stage                         |                   |                        | <b>0.008</b>             |
| pT0                                      | 2 (2.3%)          | 2 (2.3%)               |                          |
| pT2N0                                    | 83 (93.3%)        | 72 (82.8%)             |                          |
| pT3aN0                                   | 3 (3.4%)          | 13 (14.9%)             |                          |
| Path Gleason                             |                   |                        | <b>0.001</b>             |
| $\leq 6$                                 | 79 (88.8%)        | 55 (63.2%)             |                          |
| 7 (3+4)                                  | 8 (9.0%)          | 27 (31.0%)             |                          |
| 7 (4+3)                                  | 1 (1.1%)          | 2 (2.3%)               |                          |
| 8 (3+5)                                  | 0 (0%)            | 1 (1.1%)               |                          |
| 8 (4+4)                                  | 1 (1.1%)          | 1 (1.1%)               |                          |
| 9 (4+5)                                  | 0 (0%)            | 1 (1.1%)               |                          |
| Upgrade                                  | 10 (11.2%)        | 32 (36.8%)             | <b>&lt;0.001</b>         |
| PSM                                      | 5 (5.6%)          | 17 (19.8%)             | <b>0.002</b>             |
| Adverse pathology**                      | 5 (5.6%)          | 16 (18.4%)             | <b>0.009</b>             |
| CAPRA-S                                  |                   |                        | <b>&lt;0.001</b>         |
| 0-2                                      | 87 (97.8%)        | 69 (79.3%)             |                          |
| 3-5                                      | 2 (2.2%)          | 18 (20.7%)             |                          |

\*p-value derived from Wilcoxon-Mann-Whitney test, IQR=interquartile range

<sup>†</sup>p-value derived from Fisher's exact test

\*\*Adverse pathologic findings: pT2 and  $\geq G4+3$  OR pT3a and G3+3 and PSM OR pT3a and  $\geq G3+4$  OR  $\geq pT3b$
