# Supplementary material
Source: PubMed Central journal article supplement (PMC4042393)

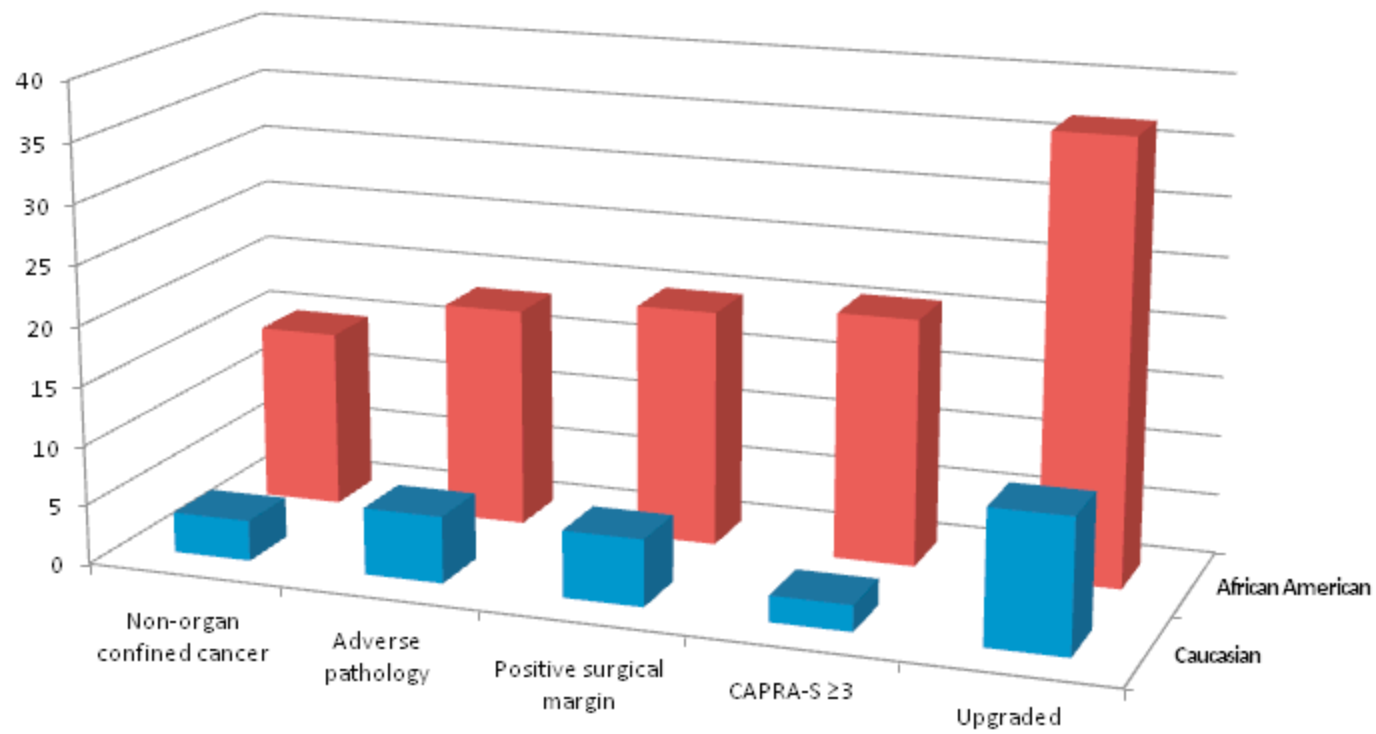

Supplement: NIHMS563197-supplement-Suppl_3.pdf [file NIHMS563197-supplement-Suppl_3.pdf]
